# Supplementary material
Source: HighWire-hosted journal article supplement (https://bmjopen.bmj.com/content/7/12/e018322)
Supplement: inline-supplementary-material-1 [file inline-supplementary-material-1.pdf]

|                                                  |                                                                                                 |                     |
|--------------------------------------------------|-------------------------------------------------------------------------------------------------|---------------------|
| Not for ICU Readmission <input type="checkbox"/> | Number of ICU Admissions:<br>[Within this hospital stay] [First admission = 1]                  | ICU Discharge Date: |
|                                                  | For patients in ICU for 4+ days: Has referral been made to post-ICU rehabilitation team? [✓/NA] |                     |
|                                                  | Has patient been given post-ICU information booklet?                                            |                     |

| Discharge Risk Score             |   | Sedated at 24 hours after admission     | 2                                        |
|----------------------------------|---|-----------------------------------------|------------------------------------------|
| Age 55-64                        | 1 | Total Advanced Care days 15+            | 3                                        |
| Age 65 +                         | 4 | Hospital stay before ITU 3+ days        | 4                                        |
| In-hospital CPR                  | 3 | Unplanned admission                     | 5                                        |
| Emergency surgery (at any stage) | 2 | Significant discharge dependency        | 1                                        |
| ICU length of stay 5+ days       | 2 | Tracheostomy on discharge               | <input type="checkbox"/>                 |
| Total Score:                     |   | Low Risk (0-9) <input type="checkbox"/> | High Risk (10+) <input type="checkbox"/> |

| Key Principles of Care as advised within NICE Guidelines 83                                                                                                                                                                                                                                                                                                                                                                                                               |  |
|---------------------------------------------------------------------------------------------------------------------------------------------------------------------------------------------------------------------------------------------------------------------------------------------------------------------------------------------------------------------------------------------------------------------------------------------------------------------------|--|
| <p>NICE Guideline 1.1.13: Within 24 hours of discharge from critical care, give information about:</p> <ul style="list-style-type: none"> <li>- The rehabilitation care pathway and, if applicable, possible physical and non-physical problems</li> <li>- The differences between critical care and ward-based care and the transfer of clinical responsibility</li> <li>- Sleeping problems, nightmares and hallucinations and adjustment to ward-based care</li> </ul> |  |
| <p>NICE Guideline 1.1.22: Before discharge to home or community, give information about:</p> <ul style="list-style-type: none"> <li>- Driving, returning to work, housing and local support services</li> <li>- The patient's physical recovery, managing activities of daily living and diet</li> <li>- [In progress: Give the patient their own copy of the critical care discharge summary]</li> </ul>                                                                 |  |
| NICE Guideline 1.1.23: Liaise with primary/community care for functional reassessment 2-3 months after ICU                                                                                                                                                                                                                                                                                                                                                                |  |

[illegible][illegible]

| PIRT and MRC Sum Scores                                                                     |      |         |
|---------------------------------------------------------------------------------------------|------|---------|
| Date                                                                                        | PIRT | MRC Sum |
|                                                                                             |      |         |
|                                                                                             |      |         |
|                                                                                             |      |         |
|                                                                                             |      |         |
|                                                                                             |      |         |
|                                                                                             |      |         |
|                                                                                             |      |         |
|                                                                                             |      |         |
|                                                                                             |      |         |
|                                                                                             |      |         |
|                                                                                             |      |         |
|                                                                                             |      |         |
|                                                                                             |      |         |
| Please also write date discharged from PIRT or hospital outcome (i.e. discharged home, RIP) |      |         |

# Patient Sticker

Examples from the short clinical assessment that may indicate the patient is at risk of developing physical and non-physical morbidity

|              |                                                                                                                                                                                                                                                                                                                                                                                                                                                                                         |
|--------------|-----------------------------------------------------------------------------------------------------------------------------------------------------------------------------------------------------------------------------------------------------------------------------------------------------------------------------------------------------------------------------------------------------------------------------------------------------------------------------------------|
| Physical     | <p>Unable to get out of bed independently.</p> <p>Anticipated long duration of critical care stay.</p> <p>Obvious significant physical or neurological injury.</p> <p>Lack of cognitive functioning to continue exercise independently.</p> <p>Unable to self ventilate on 35% of oxygen or less.</p> <p>Presence of pre-morbid respiratory or mobility problems.</p> <p>Unable to mobilise independently over short distances.</p>                                                     |
| Non-physical | <p>Recurrent nightmares, particularly where patients report trying to stay awake to avoid nightmares.</p> <p>Intrusive memories of traumatic events which have occurred prior to admission (for example, road traffic accidents) or during their critical care stay (for example, delusion experiences or flashbacks).</p> <p>New and recurrent anxiety or panic attacks.</p> <p>Expressing the wish not to talk about their illness or changing the subject quickly off the topic.</p> |

Symptoms from the functional assessment that may indicate the presence of physical and non-physical morbidity

## Physical dimensions

|                                |                                                                                                                                                                                         |
|--------------------------------|-----------------------------------------------------------------------------------------------------------------------------------------------------------------------------------------|
| Physical problems              | Weakness, inability/partial ability to sit, rise to standing, or to walk, fatigue, pain, breathlessness, swallowing difficulties, incontinence, inability/partial ability to self-care. |
| Sensory problems               | Changes in vision or hearing, pain, altered sensation.                                                                                                                                  |
| Communication problems         | Difficulties in speaking or using language to communicate, difficulties in writing.                                                                                                     |
| Social care or equipment needs | Mobility aids, transport, housing, benefits, employment and leisure needs.                                                                                                              |

## Non-physical dimensions

|                                              |                                                                                                                                                                                                                                                                            |
|----------------------------------------------|----------------------------------------------------------------------------------------------------------------------------------------------------------------------------------------------------------------------------------------------------------------------------|
| Anxiety, depression and PTS-related symptoms | New or recurrent somatic symptoms including palpitations, irritability and sweating; symptoms of derealisation and depersonalisation; avoidance behaviour; depressive symptoms including tearfulness and withdrawal; nightmares, delusions, hallucinations and flashbacks. |
| Behavioural and cognitive problems           | Loss of memory, attention deficits, sequencing problems, deficits in organisational skills, confusion, apathy, disinhibition, compromised insight.                                                                                                                         |
| Other psychological or psychosocial problems | Low-self-esteem, poor or low self-image and/or body image issues, relationship difficulties, including those with the family and/or carer.                                                                                                                                 |

During critical care stay

Before critical care discharge

During ward-based care

Before discharge to home/community

At 2-3 months after critical care discharge

|                           |                                                |          |  |
|---------------------------|------------------------------------------------|----------|--|
| Short clinical assessment |                                                | At risk? |  |
| At risk                   | Comprehensive clinical assessment              |          |  |
|                           | Identify current rehabilitation needs          |          |  |
|                           | Set short- to medium-term rehabilitation goals |          |  |
|                           | Start rehabilitation as soon as possible       |          |  |

|                           |                                                |          |  |
|---------------------------|------------------------------------------------|----------|--|
| Short clinical assessment |                                                | At risk? |  |
| At risk                   | Comprehensive clinical assessment              |          |  |
|                           | Identify current rehabilitation needs          |          |  |
|                           | Set short- to medium-term rehabilitation goals |          |  |
|                           | Start rehabilitation as soon as possible       |          |  |

|                           |                                                                                                                                      |          |  |
|---------------------------|--------------------------------------------------------------------------------------------------------------------------------------|----------|--|
| Short clinical assessment |                                                                                                                                      | At risk? |  |
| At risk                   | Comprehensive clinical assessment                                                                                                    |          |  |
|                           | Identify current rehabilitation needs                                                                                                |          |  |
|                           | Set short- to medium-term rehabilitation goals                                                                                       |          |  |
|                           | Consider a structured and supported self-directed rehabilitation manual for at least 6 weeks after critical care discharge           |          |  |
|                           | For patients with symptoms of stress related to traumatic incidents, refer to PTSD and initiate appropriate preventative strategies. |          |  |

|                                                                                                                                                          |  |
|----------------------------------------------------------------------------------------------------------------------------------------------------------|--|
| Functional assessment of physical and non-physical dimensions                                                                                            |  |
| Assess the impact of the functional assessment on the patient's activities of daily living                                                               |  |
| Review, agree and update short- and medium-term rehabilitation goals                                                                                     |  |
| Ensure that arrangements are in place for continuing rehabilitation needs , including appropriate referrals for necessary ongoing care, before discharge |  |

|                                                                                                               |  |
|---------------------------------------------------------------------------------------------------------------|--|
| Review the patient, perform a functional reassessment (face-to-face) based on the first functional assessment |  |
| Refer the patient to the appropriate rehabilitation or specialist services if:                                |  |
| - The patient is recovering at a slower rate than anticipated                                                 |  |
| - The patient has developed new unanticipated physical/non-physical morbidity                                 |  |
| If anxiety or depression is suspected refer to the stepped care models in 'Anxiety' and 'Depression'          |  |
| If PTSD is suspected or the patient has significant symptoms of post-traumatic stress, refer to 'PTSD'        |  |

Date:
Day post-ICU:
[NB day of discharge = Day 0]

If no boxes in the tool are ticked (i.e. PIRT score = 0)

Total PIRT daily review score

Patient Sticker

| Post-ICU Review Evaluation and Scoring Tool (PIRT)                                                                                                  |                                                                                                                                                                                                                                               |                                                    |                                                |
|-----------------------------------------------------------------------------------------------------------------------------------------------------|-----------------------------------------------------------------------------------------------------------------------------------------------------------------------------------------------------------------------------------------------|----------------------------------------------------|------------------------------------------------|
| Respiratory                                                                                                                                         |                                                                                                                                                                                                                                               | Triggers/Actions/Referrals                         |                                                |
| Tracheostomy                                                                                                                                        | Tracheostomy Care Bundle                                                                                                                                                                                                                      | NG drainage/reliable enteral route not established | Stomatherapy referral                          |
| Optiflow/NIV outside GHW/MSS?                                                                                                                       | Link with SALT<br>Physiotherapy referral<br>MDT referral                                                                                                                                                                                      | Unsatisfactory diabetic or glycaemic control       | Dietician/nutrition referral                   |
| New O <sub>2</sub> requirement for sO <sub>2</sub> ≥ 92%                                                                                            |                                                                                                                                                                                                                                               | New vomiting/abdominal pain/distension             | Diabetic nurse specialist referral             |
| Requiring FiO <sub>2</sub> > 0.5                                                                                                                    |                                                                                                                                                                                                                                               | Persistent BNO or Type 7 stool (3+ days)           | MDT referral                                   |
| Respiratory Rate > 30                                                                                                                               |                                                                                                                                                                                                                                               | Electrolyte abnormalities?                         | Home team intervention/C. difficile toxin test |
| Cardiovascular                                                                                                                                      |                                                                                                                                                                                                                                               | Triggers/Actions/Referrals                         |                                                |
| HR < 40, HR > 120 or persistently > 100                                                                                                             | Consider discussion with ICU SpR                                                                                                                                                                                                              | Persistent/regular use of antiemetics              | Pharmacist drug chart review                   |
| Systolic BPa < 90mmHg or > 200mmHg                                                                                                                  |                                                                                                                                                                                                                                               |                                                    |                                                |
| Investigation/treatment for:<br>MI/angina<br>Hypotension (IVI > 200ml/hr) or hypertension<br>New arrhythmia<br>Pulmonary oedema<br>Thrombotic event |                                                                                                                                                                                                                                               |                                                    |                                                |
| Hb drop (2g/dL over 10, 1g/dL under)                                                                                                                |                                                                                                                                                                                                                                               |                                                    |                                                |
| Transfusion in last 24hrs                                                                                                                           |                                                                                                                                                                                                                                               |                                                    |                                                |
| VTE Assessment needed                                                                                                                               |                                                                                                                                                                                                                                               |                                                    |                                                |
| Incorrect VTE prescription                                                                                                                          | Inform home team                                                                                                                                                                                                                              |                                                    |                                                |
|                                                                                                                                                     | Inform home team                                                                                                                                                                                                                              |                                                    |                                                |
| Neurological/Pain                                                                                                                                   |                                                                                                                                                                                                                                               | Triggers/Actions/Referrals                         |                                                |
| New confusion/delirium                                                                                                                              | Consider discussion with ICU SpR<br>Pain team review<br>Discussion with ICU Pharmacist<br>Discussion with Outreach coordinator<br>Visual Assessment Scoring for pain<br>MDT referral<br>CAM-ICU<br>HADS<br>MMSE<br>NICE CG103<br>Delirium MIL | Line phlebitis or infection                        |                                                |
| New focal neurological deficit                                                                                                                      |                                                                                                                                                                                                                                               | Rising (abnormal) WCC/CRP or WCC < normal range    |                                                |
| Coma/GCS change                                                                                                                                     |                                                                                                                                                                                                                                               | New positive blood culture, swab or CDT/MRSA       |                                                |
| Insufficient pain control                                                                                                                           |                                                                                                                                                                                                                                               | Wound dehiscence                                   | Referral to wound care team                    |
| Requiring IV opiates/local blocks                                                                                                                   |                                                                                                                                                                                                                                               |                                                    |                                                |
| Background i.v. opiate or over-opiated                                                                                                              |                                                                                                                                                                                                                                               |                                                    |                                                |
| Memory questionnaire required                                                                                                                       |                                                                                                                                                                                                                                               |                                                    |                                                |
| Needs MMSE/ICU-CAM/HADS assessment                                                                                                                  |                                                                                                                                                                                                                                               |                                                    |                                                |
| Ongoing ICU issues (delirium, hallucinations, etc.)                                                                                                 |                                                                                                                                                                                                                                               |                                                    |                                                |

Refer to actions for individual items as appropriate. Request patient review by ICU SpR if patient acutely unwell.  
If persistently raised daily review score suggest discussion with home team/referral for specialist advice/review as required.

Plans from discharge not yet completed
